# Supplementary material for: Triatomine bugs, their microbiota and Trypanosoma cruzi: asymmetric responses of bacteria to an infected blood meal
Source: PubMed Central journal article supplement (PMC5148865; doi:10.1186/s13071-016-1926-2), 2016-12-09

***Panstrongylus megistus***

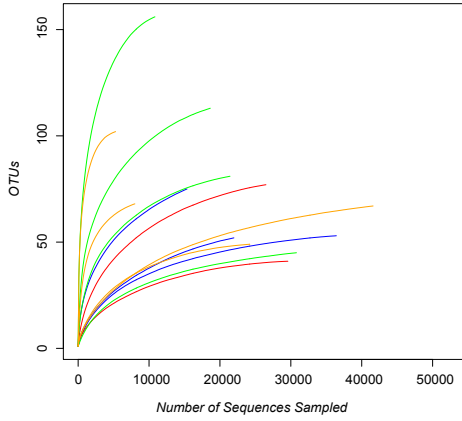

***Rhodnius prolixus***

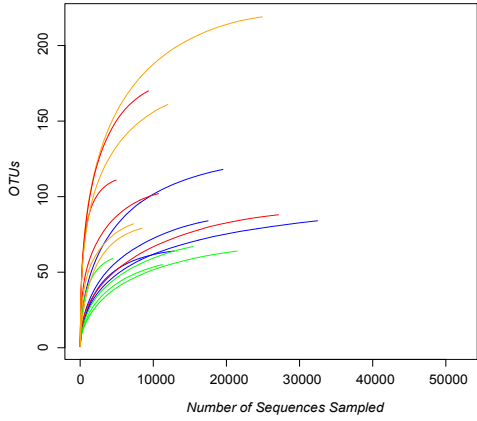

***Triatoma infestans***

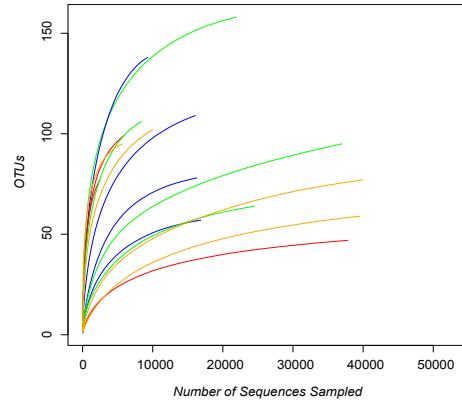

***Triatoma brasiliensis***

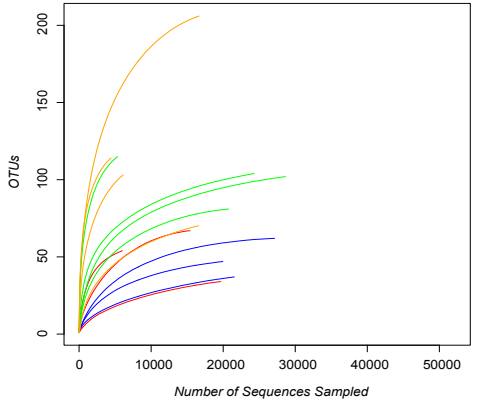

- Gut non-challenged
- Gut *T. cruzi*-challenged
- Gonads non-challenged
- Gonads *T. cruzi*-challenged

***Triatoma juazeirensis***

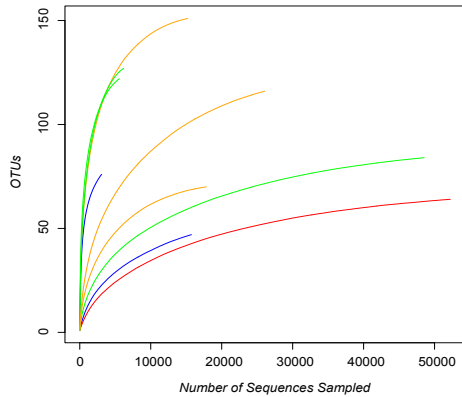

***Triatoma sherlocki***

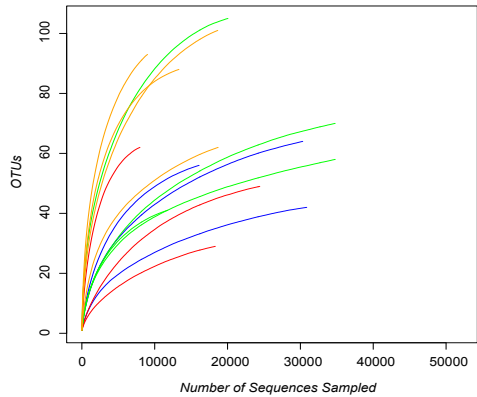

Supplement: 13071_2016_1926_MOESM4_ESM.pdf [file 13071_2016_1926_MOESM4_ESM.pdf]
